# Supplementary material
Source: PubMed Central journal article supplement (PMC3965897)
Supplement: supp_113.055525_Supplemental_Figure_1_55525.pdf [file supp_113.055525_Supplemental_Figure_1_55525.pdf]

Selective and cytokine-dependent regulation of hepatic transporters and bile acid homeostasis during infectious colitis in mice - Matthew D. Merrell, Beatrice A. Nyagode, John D. Clarke, Nathan J. Cherrington, and Edward T. Morgan

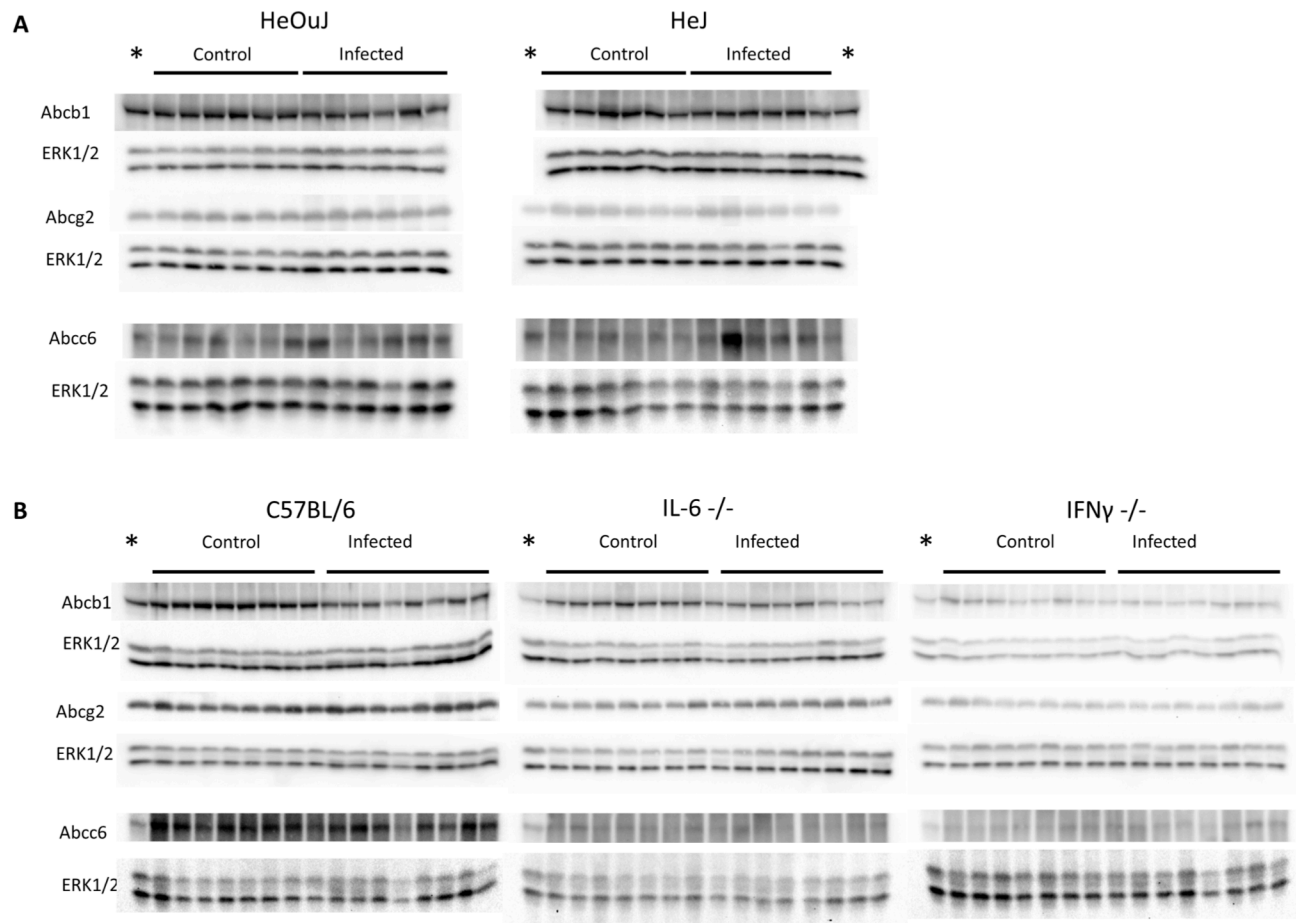

**Supplemental Figure 1:** Effect of *C. rodentium* infection on hepatic protein expression of efflux transporters. Seven days following oral infection with *C. rodentium*, female mice were sacrificed, livers harvested, and whole cell lysates prepared from A) HeOuJ and HeJ (TLR4-null) mice (n=6) and B) C57BL/6, IL-6-null, and IFN $\gamma$ -null mice (n=8). Protein levels of specific transporters were detected by western blotting. Internal controls (lanes marked \*) were used for comparison between blots. Western densitometry results of transporter expression were normalized to the loading control Erk1/2.
